# Supplementary material
Source: publisher figshare collection journal article supplement (https://karger.figshare.com/ndownloader/files/38934749)
Supplement: Supplementary file 1 [file 38934749]

Supplementary Document 1: ERAS protocol throughout the study period.

# **Preoperative period**

- Surgery and anesthesia type and risks explained during preoperative evaluation at the clinic.
- Written detailed postoperative recovery plan.
- Optimization of comorbidities and medication.
- Smoking and alcohol advice.
- Thromboembolic compression stockings.
- Intermittent use of perioperative pneumatic compression devices.
- Allow liquid foods and liquids until 6 hours before surgery.
- Oral bowel preparation over three days prior to surgery.

# **Intraoperative period**

- Optimization of fluid balance by target-directed fluid therapy.
- Avoidance of overhydration.
- Active warming with a warming blanket.
- Warm intravenous fluid with a liquid warming tube.
- Mini-open cystectomy incision.
- Epidural analgesia.

# **Postoperative period**

- Removal of the nasogastric tube at POD1 in the morning.
- Multimodal postoperative analgesia according to the WHO.
- Antiemetics as needed.
- Neostigmin, Laxans gtt, chewing gum to stimulate gut motility.
- Clear diet allowed on POD 1.
- Early mobilization beginning on POD 1.
- Early removal of pelvic drainage as possible.
- Long-term DVT prophylaxis (30 days post-surgery).
